# Supplementary material for: Machine Learning Assessment of Early Life Factors Predicting Suicide Attempt in Adolescence or Young Adulthood
Source: PubMed Central journal article supplement (PMC7955274; doi:10.1001/jamanetworkopen.2021.1450), 2021-03-12
Supplement: jamanetwopen-e211450-s001.pdf [file jamanetwopen-e211450-s001.pdf]

## Supplemental Online Content

Navarro MC, Ouellet-Morin I, Geoffroy MC, et al. Machine learning assessment of early life factors predicting suicide attempt in adolescence or young adulthood. *JAMA Netw Open*. 2021;4(3):e211450. doi:10.1001/jamanetworkopen.2021.1450

**eAppendix.** Details of Statistical Analyses

**eTable.** Assessment of Early Life Factors

**eReferences.**

This supplemental material has been provided by the authors to give readers additional information about their work.

## eAppendix. Details of Statistical Analyses

**Random forest approach:** We conducted our analyses using a random forest algorithm, a validated machine learning method with good performance and robustness.<sup>1</sup> This technique can be applied to both classification and regression problems and can handle both categorical and continuous predictors. The overall goal of a random forest algorithm is to find the most accurate combination of variables to predict a new observation.

Random forest is a non-parametric ensemble learning method that results from the aggregation of a set of decision trees, created with recursive bootstraps of the initial sample.<sup>2</sup> For each decision tree, a prediction algorithm is created with 2/3 of the subsample, the remaining observations (called out-of-bag sample, OOB) is used to test the performance of the prediction algorithm, measured by the prediction error (called out-of-bag error). Decision trees are created by performing recursive binary splits of the predictor space, containing all the predictor variables, to create sub-spaces called nodes. Each observation goes from the “parent” to the “child” node according to the optimal split value of the predictor variable obtained according to the principle of maximum homogeneity for the outcome in each node. The number of predictor variables used at each node to create the prediction was set at the square root of the total number of predictor variables ( $\sqrt{150} \approx 12$ ), while the number of trees generated by the algorithm was fixed at 1000. All the derived trees are then aggregated to obtain the final prediction model.

To perform the analysis, we randomly split our original dataset into a training and a testing sample. Each predictor was therefore obtained using the training sample (80% of observations), and subsequently validated in the testing sample (20% of observations). To obtain an unbiased estimation of the prediction error, the analyses were repeated several times with different training and testing samples resulting from different random split of the original sample.<sup>3</sup> Considering the important sex differences in mental health symptoms, we conducted separate analyses for boys and girls. Analyses were performed in R with the *randomForest* and *caret* packages.

**Variables importance in prediction:** Random forests allow one to visualize and quantify the contribution of each variable in the outcome prediction. The OOB samples, which also give the OOB prediction error, are used to calculate these measures. In each OOB sample, the values of a given variable are randomly shifted before applying the initially created prediction algorithm and computing the new prediction error. Then, the difference between the prediction error in the shifted OOB sample and the prediction error in the initial OOB sample is calculated. The magnitude of the increase of the prediction error after shifting the values of the variable is an indication of the importance of the variable in the prediction: a high increase of the prediction errors indicates that the variable is very important for the prediction mode, while a small (or undetectable) change indicates that the variable had a small contribution to the prediction.<sup>4</sup> This process is repeated for each variable in each OOB sample of the forest, so the final variable importance is obtained by averaging the differences between the prediction error in the all shifted OOB samples and the prediction error in the initial OOB samples. The ratio of error is called mean decrease in accuracy (**Figure 2** in the main text) and is unitless. The more a variable is important for the prediction, the higher the mean decrease in accuracy is.

**Dealing with unbalanced dataset:** As in most population samples, controls outnumbered cases. This unbalanced dataset may bias the prediction algorithm because it will focus only on predicting the majority class, and individuals in the minority class will be incorrectly classified. To deal with this problem, we used the Synthetic Minority Over-sampling Technique (SMOTE) algorithm<sup>5</sup> which creates synthetic data of the smallest class (i.e., symptomatic youth in our sample) based on the n-nearest neighbors method. This technique allows the random forest algorithm to have more symptomatic behavior examples to learn from. Dealing with unbalanced data in challenging for machine learning models, even if generating synthetic data is not as ideal as using a balanced sample, the SMOTE algorithm allows good predictive performance results.<sup>6,7</sup> This was performed using the R package *DMwR*.

**Dealing with Missing values:** In the original dataset, there was 5% of missing data among the predictor variables. To handle these missing data, we used the nonparametric R *missForest* algorithm to impute missing data.<sup>8</sup>

**eTable.** Assessment of Early Life Factors

|                                                                | Description                                                                                                                                                                                                                |
|----------------------------------------------------------------|----------------------------------------------------------------------------------------------------------------------------------------------------------------------------------------------------------------------------|
| <b>Birth-related characteristics</b>                           |                                                                                                                                                                                                                            |
| Birthweight (gr.)                                              | Continuous variable, measured in grams                                                                                                                                                                                     |
| Duration of pregnancy (weeks)                                  | Continuous variable, measured in weeks                                                                                                                                                                                     |
| Mother hospital transfer                                       | Mother transferred in specialized hospital (yes/no)                                                                                                                                                                        |
| Score for Neonatal Risk                                        | Continuous variable, aggregated index of characteristics indicative of the health conditions of the newborn, range 0-8                                                                                                     |
| APGAR Score 1 minute                                           | Score indicating the global newborn health and adaptation 1 minute after birth. Continuous variable, range 1-10                                                                                                            |
| APGAR Score 5 minutes                                          | Score indicating the global newborn health and adaptation 5 minutes after birth. Continuous variable, range 1-10                                                                                                           |
| Head circumference                                             | Baby head circumference after birth. Continuous variable, measured in centimeters, range 26.5-39 cm                                                                                                                        |
| Baby length                                                    | Baby size after birth. Continuous variable, measured in centimeters, range 35.5-59 cm                                                                                                                                      |
| Baby time in hospital                                          | Length of stay of the baby in the hospital after birth. Continuous variable                                                                                                                                                |
| Birth stimulation                                              | Having received stimulation to go into labor (yes/no)                                                                                                                                                                      |
| Duration of labor                                              | Time of delivery. Continuous variable, measured in hours-minutes                                                                                                                                                           |
| Episiotomy                                                     | Episiotomy for birth (yes/no)                                                                                                                                                                                              |
| Induction                                                      | Having received induction of labor (yes/no)                                                                                                                                                                                |
| Tools during labor                                             | Tools for help to give birth (yes/no)                                                                                                                                                                                      |
| Fetal presentation before birth                                | Face presentation of the baby for birth (yes/no)                                                                                                                                                                           |
| <b>Child characteristics</b>                                   |                                                                                                                                                                                                                            |
| Birth order                                                    | Continuous variable indicating the rank among the sibling                                                                                                                                                                  |
| Number of siblings                                             | Continuous variable                                                                                                                                                                                                        |
| Ethnicity                                                      | 7 variables (yes/no): Canadian, French, British, European, Amerindian, African, Other                                                                                                                                      |
| Positives interactions                                         | Score indicating positive parenting practices, rated by external evaluators during home visits with the Home Observation for Measurement of the Environment (HOME). Continuous variable, range 0-10                        |
| Attending daycare                                              | Child attended any form of daycare (yes/no)                                                                                                                                                                                |
| Daycare type                                                   | 7 variables (yes/no) indicating the type of daycare: Nursery school, Play group, Day nursery, library, child stimulation program, mother-child program, other                                                              |
| Daycare hours/week                                             | Time per week where the child attends daycare. Continuous variable                                                                                                                                                         |
| Difficult temperament (2 items one for mother, one for father) | Assessment of the child temperament using the Infant Characteristics Questionnaire (7 items). <sup>9</sup> Continuous variables, range 0-10                                                                                |
| <b>Mother-child interactions</b>                               |                                                                                                                                                                                                                            |
| IMF Simulation                                                 | Maternal stimulation of the child, rated by external evaluators during home visits with the Home Observation for Measurement of the Environment (HOME). Continuous variable, range 0-10                                    |
| IMF Verbalization                                              | Maternal vernal responsiveness to the child, rated by external evaluators during home visits with the HOME. Continuous variable, range 0-10                                                                                |
| Positive interactions                                          | Maternal positive interaction with the child, rated by external evaluators during home visits with the HOME. Continuous variable, range 0-10                                                                               |
| <b>Mother and father characteristics</b>                       |                                                                                                                                                                                                                            |
| Ethnicity                                                      | 7 variables (yes/no): Canadian, French, British, Amerindian, African, Other                                                                                                                                                |
| Age                                                            | Mother and father age at the survey. Continuous variable (years)                                                                                                                                                           |
| Language spoken at home                                        | Language spoken at home for mother/father: French only, English only, Neither English nor French, English and French, Other                                                                                                |
| Mother tongue                                                  | Parents first language: French, English (not French), Neither English or French                                                                                                                                            |
| Antisocial behavior in adolescence                             | Assessed for mother and father with binary questions on 5 different conduct problems in adolescence based on the DSM-IV criteria for conduct disorder and antisocial personality disorder. Continuous variable, range 0-10 |
| Antisocial behavior in adulthood                               | Assessed for mother and father with binary questions on 5 different conduct problems in adulthood based on the DSM-IV criteria for conduct disorder and antisocial personality disorder. Continuous variable, range 0-10   |
| Highest level of education                                     | Highest level of education achieved by the mother and father (7 response options): Before high school, High school, College, Post high school, Teaching or Communication school, Incomplete university, University         |
| Highest diploma                                                | Highest mother and father diploma: No high school diploma, High school diploma, Post high school diploma, University diploma                                                                                               |
| Working status at the survey                                   | Mother and father working at the moment of the survey (yes/no)                                                                                                                                                             |
| Working status, past 12 months                                 | Mother and father working in the past 12 months (yes/no)                                                                                                                                                                   |
| Type of employment                                             | Type of work status (3 response options): Unemployed, Part-time, Full-time                                                                                                                                                 |

|                                                                                                           |                                                                                                                                                                                                                                                                                                                                              |
|-----------------------------------------------------------------------------------------------------------|----------------------------------------------------------------------------------------------------------------------------------------------------------------------------------------------------------------------------------------------------------------------------------------------------------------------------------------------|
| Previous wedding                                                                                          | Mother and father previous wedding (yes/no)                                                                                                                                                                                                                                                                                                  |
| Immigration status                                                                                        | Mother and father immigration status (3 response options): Not immigrant, European immigrant, Non-European immigrant                                                                                                                                                                                                                         |
| Years since immigration                                                                                   | Mother and father years since immigration (4 response options): Not immigrant, Less than 5 years, 5 to 9 years, More than 10 years                                                                                                                                                                                                           |
| Depression <sup>10</sup>                                                                                  | Mother and father depression score, assessed using a short version of the Centre for Epidemiological Study Depression Scale. Continuous variable, scale 0-10                                                                                                                                                                                 |
| Parental parenting: Self-efficacy, impact, hostility–reactivity, warmth, and overprotection <sup>11</sup> | 5 variables assessing the following parenting dimensions for mother and father: perceived self-efficacy (6 items), impact (6 items), hostility-reactivity (7 items), warmth/affection (5 items) and overprotection (5 items) to the child. Assessed with the Parental Cognitions and Conduct Toward the Infant Scale. Continuous, range 0-10 |
| Feeling about own health*                                                                                 | General feeling about her own health: Poor, Fair, Good, Very Good, Excellent                                                                                                                                                                                                                                                                 |
| Number of abortions*                                                                                      | How often the mother had an abortion. Continuous variable                                                                                                                                                                                                                                                                                    |
| Smoke during pregnancy*                                                                                   | 4 variables related to smoke during pregnancy (yes/no): First trimester, Second trimester, Third trimester, All pregnancy                                                                                                                                                                                                                    |
| Number of cigarettes*                                                                                     | Number of cigarettes smoked per day during pregnancy. Continuous variable                                                                                                                                                                                                                                                                    |
| Alcohol during pregnancy*                                                                                 | Mother consumed alcohol during pregnancy (7 response options): Never, Less than once per month, 1 to 3 times/months, Once per week, 2 to 3 times/week, 4 to 6 times/week, Every day                                                                                                                                                          |
| Number of drinks*                                                                                         | Usual quantity of alcohol during the pregnancy (4 response options): Zero, 1-2 glasses, 3-4 glasses, More than 5 glasses                                                                                                                                                                                                                     |
| Timing of alcohol consumption*                                                                            | 4 variables indicating alcohol consumption (yes/no): First trimester, Second trimester, Third trimester, All pregnancy                                                                                                                                                                                                                       |
| Prescribed medications*                                                                                   | 4 variables indicating use of prescribed medications (yes/no): First trimester, Second trimester, Third trimester, All pregnancy                                                                                                                                                                                                             |
| Over-the-counter medications*                                                                             | 4 variables indicating use of over-the-counter medications (yes/no): First trimester, Second trimester, Third trimester, All pregnancy                                                                                                                                                                                                       |
| Illegal drugs*                                                                                            | 4 variables indicating use of illegal drugs (yes/no): First trimester, Second trimester, Third trimester, All pregnancy                                                                                                                                                                                                                      |
| <b>Family characteristics</b>                                                                             |                                                                                                                                                                                                                                                                                                                                              |
| Family size                                                                                               | Number of persons at home. Continuous variable.                                                                                                                                                                                                                                                                                              |
| Primary source of income                                                                                  | Main source of income of the household (4 response options): Salary, Self-employment, Welfare, Unemployment insurance, Other                                                                                                                                                                                                                 |
| Insufficient household income                                                                             | Calculated according to Statistics Canada's guidelines and categorized into: Sufficient, Insufficient, Very insufficient                                                                                                                                                                                                                     |
| Socioeconomic status                                                                                      | Continuous variable, aggregation of 5 items (e.g. parental education, occupation and annual gross income), range -3;3 and 0 centered.                                                                                                                                                                                                        |
| Family type                                                                                               | 2 items family structure at the survey and at birth (3 response options): Intact, Always single parent, Widowed                                                                                                                                                                                                                              |
| Single-parent family                                                                                      | Baby birth in a single-parent family (yes/no)                                                                                                                                                                                                                                                                                                |
| Biological parents at home                                                                                | 2 variables (yes/no): both biological parents; biological father living at home                                                                                                                                                                                                                                                              |
| Marital status at childbirth                                                                              | Parents marital status at birth (5 response options): Married; Common Law, Common law but married later, Separated, Never lived together                                                                                                                                                                                                     |
| Period of relationship before birth                                                                       | Time between relationship starts and birth in months. Continuous variable                                                                                                                                                                                                                                                                    |
| Family functioning <sup>12</sup>                                                                          | Assessed with 7 items (eg, do not get along well together) from McMaster Family assessment administered to the mother. Continuous variable, range 0-10 (high scores reflect high dysfunction)                                                                                                                                                |
| Language spoken at home                                                                                   | Language spoken at home by parents (5 response options): Only French, Only English, Neither French nor English, French and English, French or English +another language                                                                                                                                                                      |
| <b>Neighborhood characteristics</b>                                                                       |                                                                                                                                                                                                                                                                                                                                              |
| Dangerous neighborhood                                                                                    | Measured using 7 items from the Simcha-Fagan Neighbourhood Questionnaire. <sup>13</sup> Continuous variable, range 0-10                                                                                                                                                                                                                      |
| Social problems in the neighborhood                                                                       | Measured using 6 items from the Simcha-Fagan Neighbourhood Questionnaire. <sup>13</sup> Continuous variable, range 0-10                                                                                                                                                                                                                      |

All variables were reported by the person most knowledgeable about the child (mother in 98% of the cases), except when otherwise specified; <sup>a</sup> Extracted from the birth registry; \* Answered only by the mothers

## eReferences

1. Kaur A, Kaur K. An Empirical Study of Robustness and Stability of Machine Learning Classifiers in Software Defect Prediction. In: El-Alfy E-SM, Thampi SM, Takagi H, Piramuthu S, Hanne T, eds. *Advances in Intelligent Informatics. Advances in Intelligent Systems and Computing*. Springer International Publishing; 2015:383-397. doi:10.1007/978-3-319-11218-3\_35
2. Breiman L. Random Forests. *Machine Learning*. 2001;45(1):5-32. doi:10.1023/A:1010933404324
3. Poldrack RA, Huckins G, Varoquaux G. Establishment of Best Practices for Evidence for Prediction: A Review. *JAMA Psychiatry*. Published online November 27, 2019. doi:10.1001/jamapsychiatry.2019.3671
4. Genuer R, Poggi J-M, Tuleau-Malot C. Variable selection using random forests. *Pattern Recognition Letters*. 2010;31(14):2225-2236. doi:10.1016/j.patrec.2010.03.014
5. Chawla NV, Bowyer KW, Hall LO, Kegelmeyer WP. SMOTE: Synthetic Minority Over-sampling Technique. *Journal of Artificial Intelligence Research*. 2002;16:321-357. doi:10.1613/jair.953
6. Amin A, Anwar S, Adnan A, et al. Comparing Oversampling Techniques to Handle the Class Imbalance Problem: A Customer Churn Prediction Case Study. *IEEE Access*. 2016;4:7940-7957. doi:10.1109/ACCESS.2016.2619719
7. Teh K, Armitage P, Tesfaye S, Selvarajah D, Wilkinson ID. Imbalanced learning: Improving classification of diabetic neuropathy from magnetic resonance imaging. *PLOS ONE*. 2020;15(12):e0243907. doi:10.1371/journal.pone.0243907
8. Stekhoven DJ, Bühlmann P. MissForest—non-parametric missing value imputation for mixed-type data. *Bioinformatics*. 2012;28(1):112-118. doi:10.1093/bioinformatics/btr597
9. Bates JE, Freeland CAB, Lounsbury ML. Measurement of Infant Difficultness. *Child Development*. 1979;50(3):794-803. doi:10.2307/1128946
10. Lewinsohn PM, Seeley JR, Roberts RE, Allen NB. Center for Epidemiologic Studies Depression Scale (CES-D) as a screening instrument for depression among community-residing older adults. *Psychol Aging*. 1997;12(2):277-287.
11. Boivin M, Pérusse D, Dionne G, et al. The genetic-environmental etiology of parents' perceptions and self-assessed behaviours toward their 5-month-old infants in a large twin and singleton sample. *Journal of Child Psychology and Psychiatry*. 2005;46(6):612-630. doi:10.1111/j.1469-7610.2004.00375.x
12. Ontario Child Health Study: Reliability and Validity of the General Functioning Subscale of the McMaster Family Assessment Device - BYLES - 1988 - Family Process - Wiley Online Library. Accessed October 8, 2019. <https://onlinelibrary.wiley.com/doi/full/10.1111/j.1545-5300.1988.00097.x>
13. McGuire JB. The reliability and validity of a questionnaire describing neighborhood characteristics relevant to families and young children living in urban areas. *Journal of Community Psychology*. 1997;25(6):551-566. doi:10.1002/(SICI)1520-6629(199711)25:6<551::AID-JCOP5>3.0.CO;2-S
